# Supplementary material for: Versatile Pickering emulsion gel lubricants stabilized by cooperative interfacial graphene oxide-polymer assemblies
Source: Royal Society of Chemistry journal article supplement (doi:10.1039/d4mh00364k), 2024-01-01
Supplement: d4mh00364k1.pdf [file d4mh00364k1.pdf]

1 **Electronic Supplementary Information for**  
2 **Versatile Pickering Emulsion Gel Lubricants**  
3 **Stabilized by Cooperative Interfacial Graphene**  
4 **Oxide-Polymer Assemblies**

5  
6 Weiyang Yu <sup>a,b</sup>, Zhongying Ji <sup>a,b</sup>, Yang Lyu <sup>b</sup>, Xudong Sui <sup>a,c</sup>, Jingcheng Hao\* <sup>b,d</sup>, Lu Xu\* <sup>a,b</sup>

7  
8 <sup>a</sup> State Key Laboratory of Solid Lubrication, Lanzhou Institute of Chemical Physics, Chinese  
9 Academy of Sciences, Lanzhou 730000, China

10 <sup>b</sup> Shandong Laboratory of Advanced Materials and Green Manufacturing at Yantai, Yantai  
11 264006, China

12 <sup>c</sup> Institute for Engineering Design and Product Development, Tribology Research Division,  
13 TU Wien, Vienna 1060, Austria

14 <sup>d</sup> Key Laboratory of Colloid and Interface Chemistry & Key Laboratory of Special Aggregated  
15 Materials (Ministry of Education), Shandong University, Jinan 250100, China

16 Corresponding authors. \*E-mail: [jhao@sdu.edu.cn](mailto:jhao@sdu.edu.cn); [xulu@licp.cas.cn](mailto:xulu@licp.cas.cn).

17

## 18 **S1: Experimental Section**

### 19 **Materials**

20 Single-layer graphene oxide (GO) nanosheets were purchased from XFNANO Co. Ltd., China.  
21 Diaminopropyl-terminated polydimethylsiloxane (NH<sub>2</sub>-PDMS-NH<sub>2</sub>) with a molecular weight  
22 of ~27000 g mol<sup>-1</sup> was obtained from Macklin Inc., China. Dimethyl silicone oil (DSO, H201-  
23 100), hydrochloric acid (HCl, 36-38%), and sodium hydroxide (NaOH) were received from  
24 Sinopharm Chemical Reagent Co. Ltd, China. All the chemicals have a purity of no less than  
25 98% and were used as received. Ultrapure water ( $\rho = 18.25 \text{ m}\Omega \cdot \text{cm}$ ) was used to prepare all the  
26 sample solutions and gels.

### 27 **Preparation of the Pickering Emulsion Gels**

28 The attractive water-in-oil Pickering emulsion gels were prepared by directly mixing aqueous  
29 dispersions of GO nanosheets and oil solutions of NH<sub>2</sub>-PDMS-NH<sub>2</sub> at desired concentrations  
30 and pH values under vortexing for about 10 min. Stable Pickering emulsion gels could then be  
31 obtained after standing at room temperature within 5 h. Aqueous NaOH and HCl solutions (1  
32 mol L<sup>-1</sup>) were used to regulate the pH values of GO dispersions. All the gel samples were stored  
33 in glass serum bottles sealed with tightly covered parafilms to avoid water evaporation. Their  
34 water contents before and after stored for 30 days were  $51.0 \pm 0.5 \text{ wt}\%$  and  $50.3 \pm 0.6 \text{ wt}\%$ ,  
35 respectively, demonstrative of no significant water loss.

### 36 **Characterization**

37 Transmission electron microscopy (TEM, JEM-1011, JEOL, Japan) was used to determine the  
38 morphology of GO nanosheets at an acceleration voltage of 100 kV. Optical microscopy (OM,  
39 Axioskop, Zeiss, Germany) was used to determine the internal microstructures of a Pickering  
40 emulsion gel. Fluorescence microscopy (FM, Axio Scope A1, Zeiss, Germany) was utilized to  
41 measure the type of the Pickering emulsion gels. A hydrophilic dye sodium fluorescein  
42 (Aladdin Biochemical Technology Co. Ltd., China) was used to stain the dispersed aqueous

43 phase for FM imaging. All the optical and fluorescent micrographs were taken from the same  
44 batch of samples after desired days of storage. Field-emission scanning electron microscopy  
45 (FE-SEM, JSM-760F, Zeiss, Germany) was employed to characterize the surface topography  
46 of a steel substrate after lubricated with different materials or submerged in water for different  
47 periods with or without surface coating of the Pickering emulsion gels. All the metal surfaces  
48 were directly visualized without deposition of additional conductive materials in advance due  
49 to their inherent high conductivity. A zeta potential analyser (ZetaNano ZS90, Malvern, UK)  
50 was used to measure the zeta potential values of a GO dispersion at different studied pH values.  
51 A thermal conductivity analyser (TPS 2500S, Hot Disk, Sweden) was utilized to measure the  
52 thermal conductivity of water, DSO and Pickering emulsion gels with different water volume  
53 fractions. The viscoelasticity and thixotropy of the Pickering emulsion gels were measured  
54 using a rheometer (MCR-302, Anton Paar, Austria) in 25-mm (in diameter) parallel-plate  
55 geometry. No slippage was discovered during the whole measuring process. The testing stress  
56 was set to be between 0.1 and 30 Pa, the studying frequency range was from 0.01 to 100 Hz,  
57 and the testing strain was between 0.01% and 100%. Freshly prepared gel samples were used  
58 in each test. The measuring temperature was set to be  $25 \pm 1$  °C. The volume of the grease-like  
59 gels was controlled by setting the sample gap at constant at 1.0 mm, and the excess gels were  
60 trimmed after the final gap height was reached. No solvent trap for the emulsion gels was used  
61 in this study.

## 62 **Interfacial Property Analysis**

63 The interfacial tension of the water/DSO interface after adsorbed with the GO nanosheets, the  
64  $\text{NH}_2\text{-PDMS-NH}_2$  polymers, and the  $\text{GO/NH}_2\text{-PDMS-NH}_2$  cooperative assemblies was  
65 measured using constrained drop surfactometry. Constrained drop surfactometry is a new-  
66 generation droplet-based tensiometry technique developed by Zuo et al.<sup>1-3</sup> It employs a 3-mm  
67 (in diameter) sessile water droplet to accommodate adsorbed polymer and/or nanoparticle films.  
68 The droplet is “constrained” on a carefully machined hydrophilic pedestal using its knife-sharp

69 edge to prevent film leakage at low interfacial tensions and is enclosed in a quartz cuvette filled  
70 with pure DSO or the oil solutions of NH<sub>2</sub>-PDMS-NH<sub>2</sub> to generate a water/oil interface. The  
71 interfacial film can be compressed and expanded either quasi-statically or dynamically by  
72 precisely controlling liquid flow out of and into the droplet with a motorized syringe. The  
73 interfacial tension was determined according to the shape of the aqueous droplet in real-time  
74 using closed-loop axisymmetric drop shape analysis (CL-ADSA).<sup>3, 4</sup> Specifically, the shape of  
75 sessile droplets is controlled by the mechanical balance between the interfacial tension and local  
76 gravity. And the interfacial tension can be determined from the shape of the droplet once gravity  
77 is known according to the Laplace equation of capillary  $\Delta P = \gamma \left( \frac{1}{R_1} + \frac{1}{R_2} \right) = \frac{2\gamma}{R_0} + \Delta\rho g z$ , where  
78  $\Delta P$  refers to the Laplace pressure,  $\gamma$  is the oil/water interfacial tension,  $R_1$  and  $R_2$  are the two  
79 principal curvature radii at the studied point of the interface,  $R_0$  refers to the curvature radius at  
80 the apex of the sessile droplet,  $\Delta\rho$  is the density difference across the interface,  $g$  refers to the  
81 local acceleration of gravity, and  $z$  is the vertical distance between the apex and the studied  
82 point.

83 The interfacial jamming of the GO/NH<sub>2</sub>-PDMS-NH<sub>2</sub> nanoparticle surfactant was studied  
84 both using the constrained drop surfactometry and an optical contact angle meter (Attension®  
85 Theta Flex, Biolin Scientific, Finland) in pendent drop configurations. The GO-covered solid  
86 substrate for contact angle measurements was prepared by depositing high-concentration  
87 aqueous GO dispersions onto a glass substrate and then drying at ambient temperature. Such  
88 process was repeated for several times until the whole glass surface turned completely black. A  
89 commercial multi-functional tensiometer (K100, Krüss, Germany) was employed to study the  
90 squeezing and detaching behaviour between aqueous GO droplets in the continuous oil phase.  
91 Specifically, two freshly prepared GO droplets (~ 5  $\mu$ L) were placed at the bottom and  
92 suspended on the top of the container, respectively. The bottom droplet then slowly approached  
93 and squeezed the top droplet at a rate of 0.01 mm s<sup>-1</sup>. It started to detach from the top droplet

94 when the repulsive force reached  $\sim 14.7 \mu\text{N}$  and the weight-displacement curves can be  
95 recorded during the process.

### 96 **Tribological Measurements**

97 A commercial UMT friction and wear tester (UMT-TRIBOLAB, Bruker, Germany) with a  
98 reciprocating ball-on-disc configuration using a  $\text{Si}_3\text{N}_4$  ball ( $d = 10 \text{ mm}$ ) and steel substrate ( $d =$   
99  $24 \text{ mm}$ ) or a  $\text{Si}_3\text{N}_4$  ball ( $d = 10 \text{ mm}$ ) and silicone wafer ( $d = 10 \text{ mm}$ ) as counterparts was used  
100 to determine the tribological performance of the water-in-oil Pickering emulsion gels. Both the  
101 ball and substrate were cleaned ultrasonically in petroleum ether and methanol before each  
102 measurement. The under-water friction and wear tests were conducted by submerging the  
103 measuring ball and substrate in a steel tank filled with water and the substrate was fixed onto  
104 the bottom of the tank to avoid any possible slips or movements of the substrate during the  
105 measurements. The testing temperature was set to be  $25 \text{ }^\circ\text{C}$ , the applied normal loads were 10-  
106 200 N for the  $\text{Si}_3\text{N}_4$ /steel tribopair and 5-80 N for the  $\text{Si}_3\text{N}_4$ /silicone tribopair, respectively, and  
107 the sliding velocities were  $20\text{-}160 \text{ mm s}^{-1}$  for both the tribopairs. A 3D surface profilometer  
108 (MicroXAM-800, KLA-Tencor, USA) was utilized to measure the resultant wear volume and  
109 abrasive scar of a steel substrate after lubricated with different materials. All the tribological  
110 measurements were repeated for at least three times to ensure good reproducibility.

### 111 **Anti-Corrosion Tests**

112 Polished steel blocks with or without coating of a small amount of Pickering emulsion gels  
113 were immersed in deionized water at  $50 \text{ }^\circ\text{C}$  for 10 and 72 h, respectively. The testing media  
114 were encapsulated in centrifugal tubes sealed with tightly covered parafilms to minimize  
115 volatilization. And the centrifugal tubes were placed in a water bath for an accurate temperature  
116 control.

117 An electrochemical workstation (CHI660E, Shanghai Chenhua, China) with a three-  
118 electrode configuration was employed to analyse the anti-corrosion performance and  
119 mechanism of the Pickering emulsion gels. A steel electrode covered with a small amount of

120 the Pickering emulsion gels with an exposed area of  $0.07 \text{ cm}^2$  was used as the working electrode  
121 in the electrochemical measurements. A platinum electrode and a saturated calomel electrode  
122 were selected as the counter electrode and the reference electrode, respectively. A 3.5 wt%  
123 aqueous NaCl solution was used as the testing media. The measuring potential range was set to  
124 be between -1.0 and 1.0 V, and the scanning rate was set to be  $5 \text{ mV s}^{-1}$ . All the working steel  
125 electrodes were placed in the testing media for about 1 h to stabilize the open-circuit potential  
126 (OCP) before each measurement. The electrochemical impedance spectroscopy (EIS) was  
127 obtained in a range between 0.01 and 100 kHz with a potential amplitude of 10 mV at the OCP.  
128 Control experiments were performed with bared steel electrodes immersed in the saline and  
129 pure DSO, respectively. Each measurement was repeated for at least three times to ensure good  
130 reproducibility.

### 131 **Under-Water Printing of the Pickering Emulsion Gels**

132 Aqueous GO dispersions stained with different dyes were used to prepare colourful Pickering  
133 emulsion gel inks for 3D printing. The spiral and snake-shaped patterns were created using a  
134 commercially available pressure-driven 3D printer (Bio-Architect® SR, REGENOVO, China)  
135 that uses G-code commands to control the trajectories of the print head. The other 2D  
136 geometries and 3D structures were obtained by direct extrusion printing of the Pickering  
137 emulsion gel inks into water with a syringe.

138

139 **S2: Supplementary Figures**

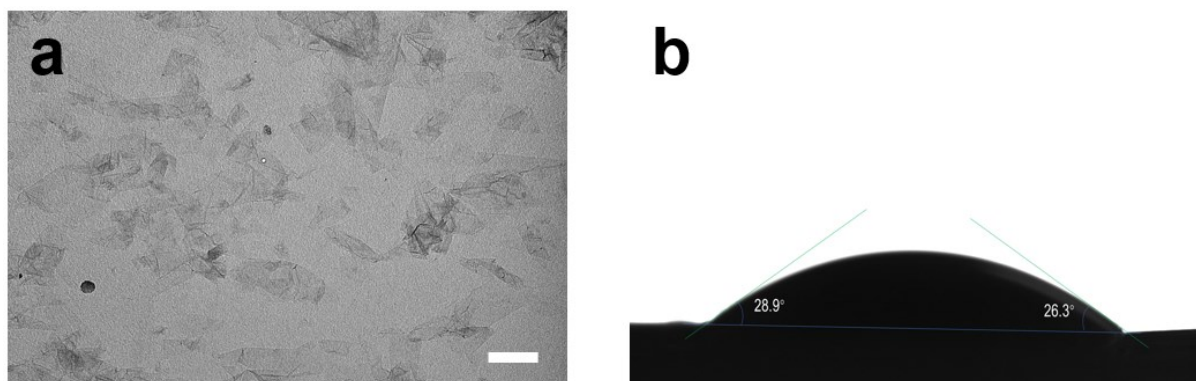

140

141 **Fig. S1** (a) TEM observation of the GO nanosheets used for assembling Pickering emulsion

142 gels. Scale bar = 1  $\mu\text{m}$ . (b) Contact angle of a pure water droplet deposited onto a GO-covered

143 glass substrate.  $T = 25\text{ }^\circ\text{C}$ .

144

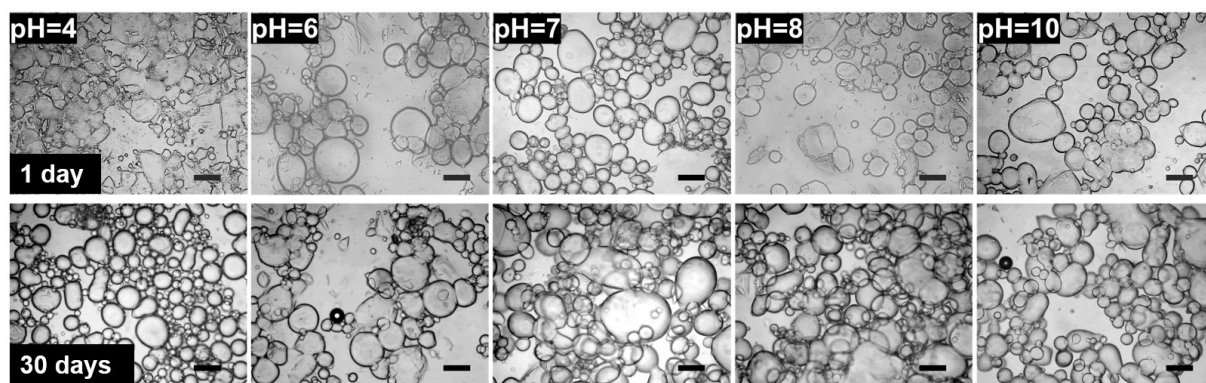

145

146 **Fig. S2** Optical micrographs of the internal microstructure of the Pickering emulsion gels at

147 different studied pH values. Scale bar = 100  $\mu\text{m}$ .  $c_{\text{GO}} = 0.3 \text{ mg mL}^{-1}$ .  $c_{\text{NH}_2\text{-PDMS-NH}_2} = 10 \text{ mg mL}^{-1}$ .

148 <sup>1</sup>.  $V_{\text{W}}\% = 50\%$ .  $T = 25 \text{ }^\circ\text{C}$ .

149



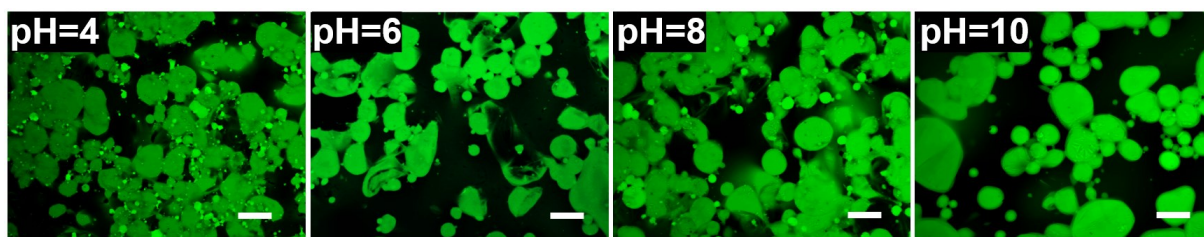

150

151 **Fig. S3** Fluorescent micrographs of the Pickering emulsion gels stained with a fluorescent dye

152 sodium fluorescein at different pH values. Scale bar = 100  $\mu\text{m}$ .  $c_{\text{GO}} = 0.3 \text{ mg mL}^{-1}$ .  $c_{\text{NH}_2\text{-PDMS-}}$

153  $\text{NH}_2 = 10 \text{ mg mL}^{-1}$ .  $V_{\text{W}}\% = 50\%$ .  $T = 25 \text{ }^\circ\text{C}$ .

154

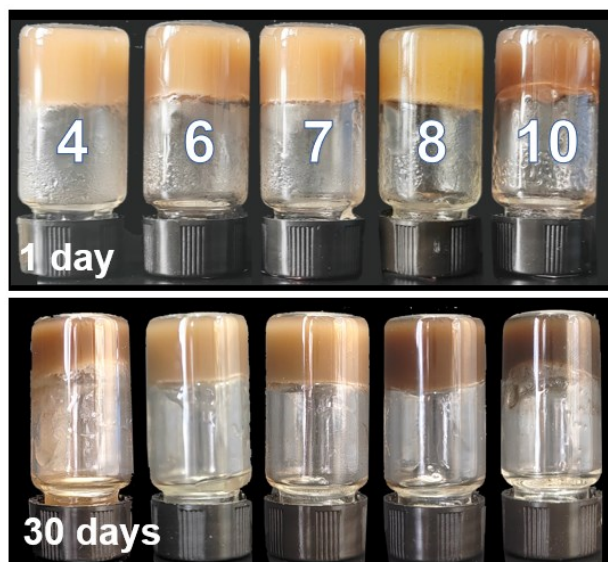

155

156 **Fig. S4** Photographs of the Pickering emulsion gels at different studied pH values after stored  
157 at room temperature for 1 and 30 days. Scale bar = 100  $\mu\text{m}$ .  $c_{\text{GO}} = 0.3 \text{ mg mL}^{-1}$ .  $c_{\text{NH}_2\text{-PDMS-NH}_2}$   
158 = 10  $\text{mg mL}^{-1}$ .  $V_{\text{w}}\% = 50\%$ .

159

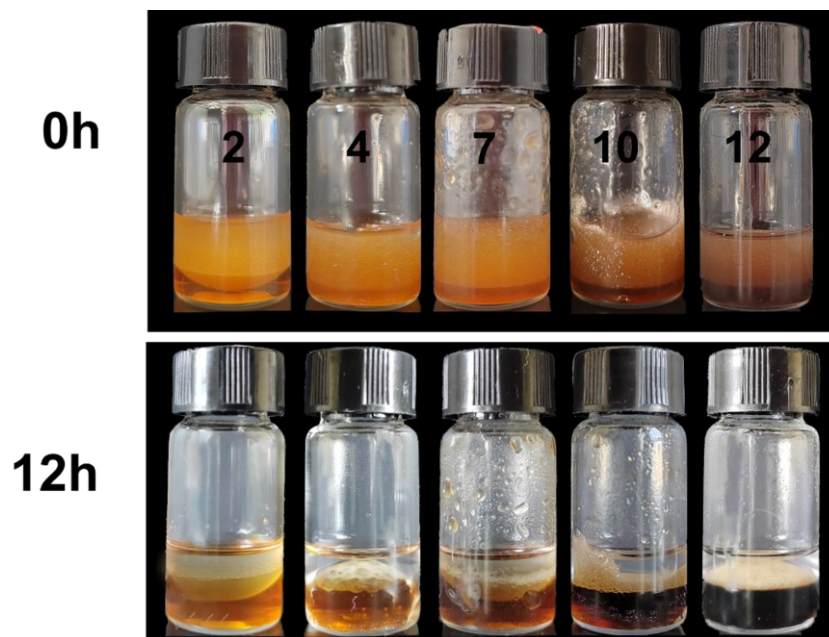

160

161 **Fig. S5** Photographs of DSO/water mixtures stabilized by GO independently at different pH

162 values at 25 °C.  $c_{GO} = 0.5 \text{ mg mL}^{-1}$ .  $V_W\% = 50\%$ .

163

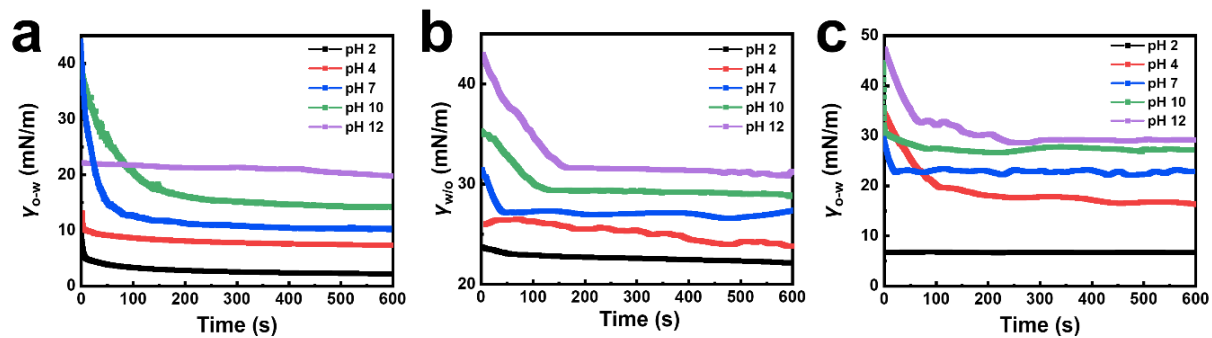

164  
 165 **Fig. S6** Equilibrium water/oil interfacial tension of the (a) GO/NH<sub>2</sub>-PDMS-NH<sub>2</sub> nanoparticle  
 166 surfactant, (b) pure GO nanosheets, and (c) pure NH<sub>2</sub>-PDMS-NH<sub>2</sub> ligands at different pH values.  
 167  $c_{GO} = 0.3 \text{ mg mL}^{-1}$ .  $c_{NH_2\text{-PDMS-NH}_2} = 10 \text{ mg mL}^{-1}$ .  $T = 25 \text{ }^\circ\text{C}$ .

168

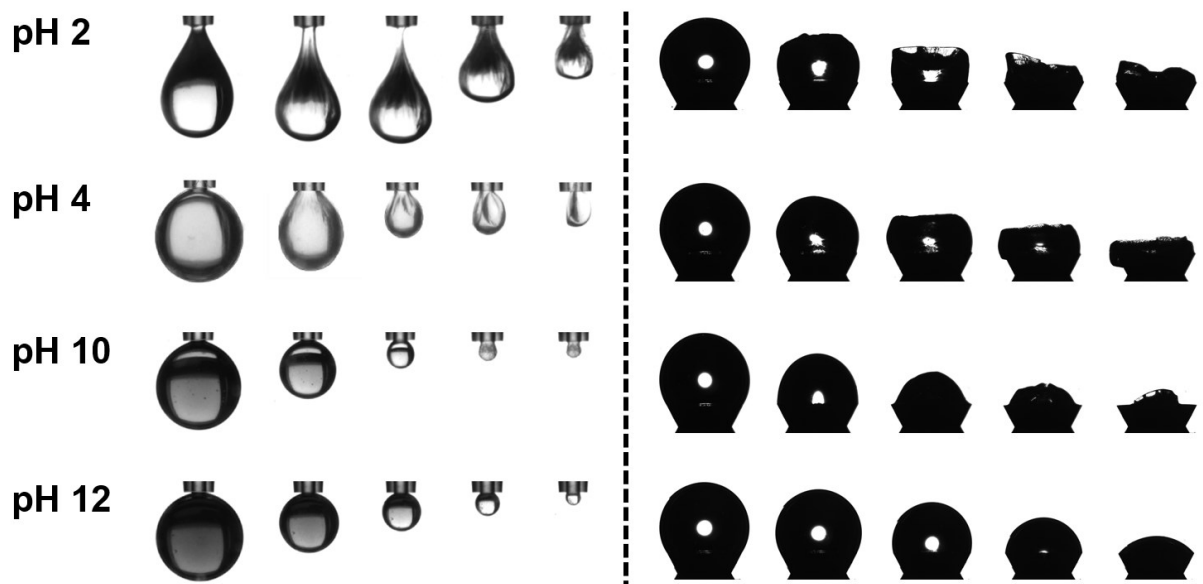

169

170 **Fig. S7** Snapshots of the aqueous GO droplets immersed in the  $\text{NH}_2\text{-PDMS-NH}_2$  oil solutions  
 171 with different pH values upon slowly withdrawing the internal dispersed phase under both  
 172 pendant drop (left) and constrained sessile drop (right) configurations.  $c_{\text{GO}} = 0.3 \text{ mg mL}^{-1}$ .  $c_{\text{NH}_2\text{-PDMS-NH}_2} = 10 \text{ mg mL}^{-1}$ .  $T = 25 \text{ }^\circ\text{C}$ .

174

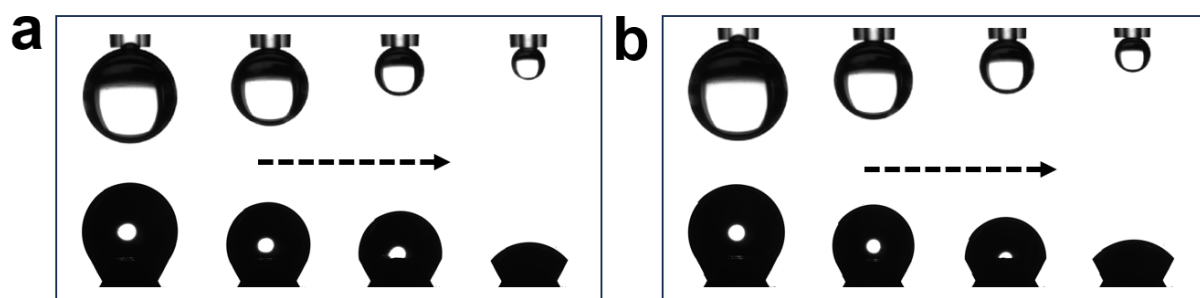

175

176 **Fig. S8** Snapshots of (a) pure water droplets immersed in the  $\text{NH}_2\text{-PDMS-NH}_2$  oil solutions and  
 177 (b) the aqueous GO droplets immersed in pure oil upon slowly withdrawing the internal  
 178 dispersed phase under both pendant drop (top) and constrained sessile drop (bottom)  
 179 configurations.  $c_{\text{GO}} = 0.3 \text{ mg mL}^{-1}$ .  $c_{\text{NH}_2\text{-PDMS-NH}_2} = 10 \text{ mg mL}^{-1}$ .  $\text{pH} = 7$ .  $T = 25 \text{ }^\circ\text{C}$ .

180

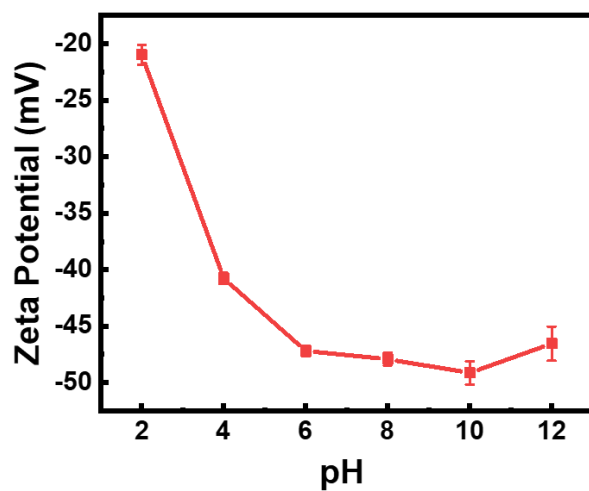

181  
182 **Fig. S9** Variations in the zeta potential values of aqueous GO dispersions as a function of the  
183 pH value.  $c_{GO} = 0.3 \text{ mg mL}^{-1}$ .  $T = 25 \text{ }^\circ\text{C}$ .

184

1 day

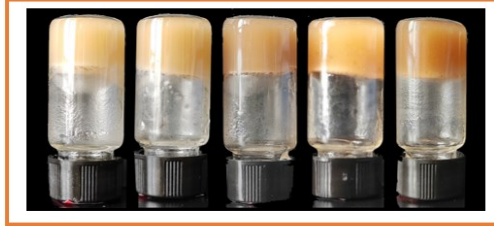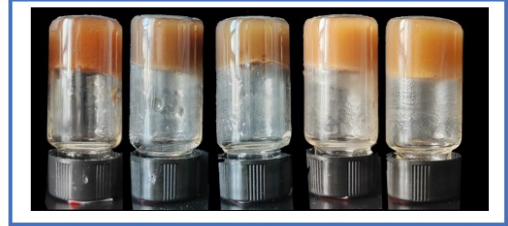

30 days

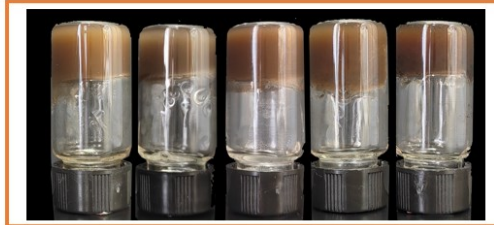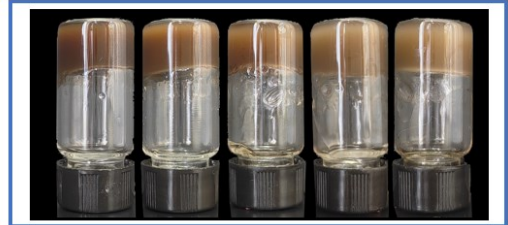

185

186 **Fig. S10** Photographs of the Pickering emulsion gels shown in Figure 2a after stored at ambient

187 temperature for 1 and 30 days.

188



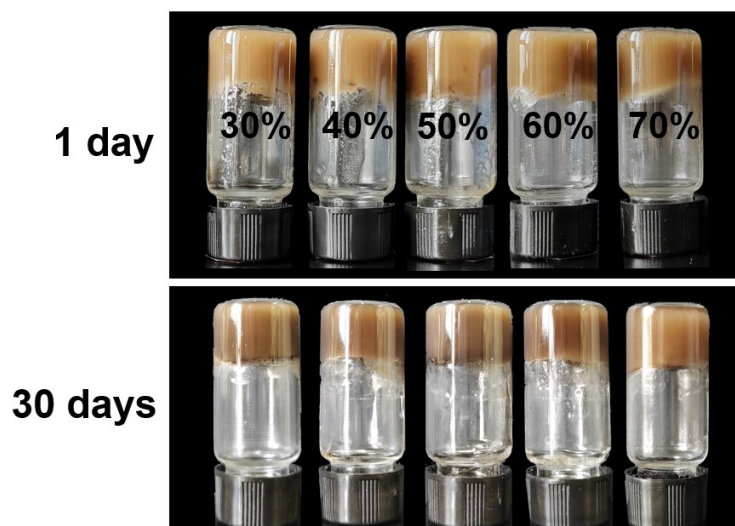

189

190 **Fig. S11** Photographs of the Pickering emulsion gels prepared with different water volume

191 fractions after stored at room temperature for 1 and 30 days.  $c_{GO} = 0.3 \text{ mg mL}^{-1}$ .  $c_{NH_2-PDMS-NH_2}$

192  $= 10 \text{ mg mL}^{-1}$ .  $\text{pH} = 7$ .

193

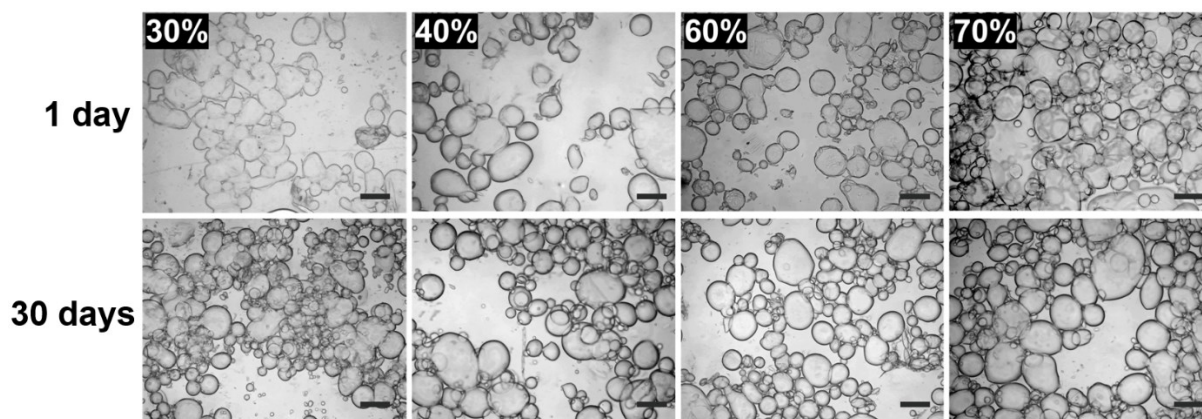

194

195 **Fig. S12** Optical micrographs of the Pickering emulsion gels prepared with different water

196 volume fractions after stored at ambient temperature for 1 and 30 days.  $c_{GO} = 0.3 \text{ mg mL}^{-1}$ .

197  $c_{NH2-PDMS-NH2} = 10 \text{ mg mL}^{-1}$ .  $\text{pH} = 7$ .

198

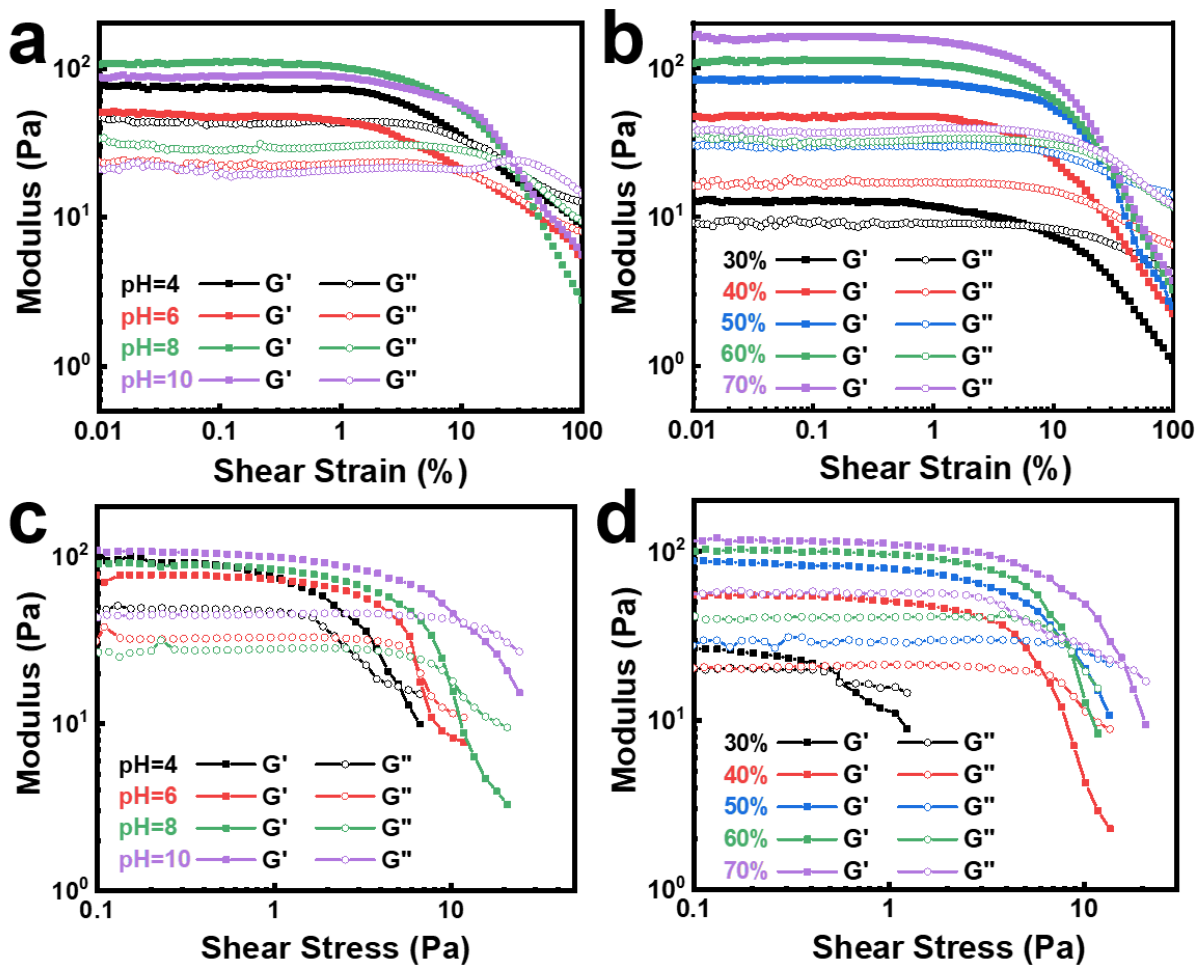

199  
 200 **Fig. S13** Strain and stress sweeps of the Pickering emulsion gels at (a, c) different studied pH  
 201 values and a constant water volume fraction of 50% and (b, d) different water volume fractions  
 202 and a constant pH value of 7 at 25 °C. The measuring shear frequency was 1 Hz.  $c_{GO} = 0.3 \text{ mg}$   
 203  $\text{mL}^{-1}$ .  $c_{NH_2-PDMS-NH_2} = 10 \text{ mg mL}^{-1}$ .

204

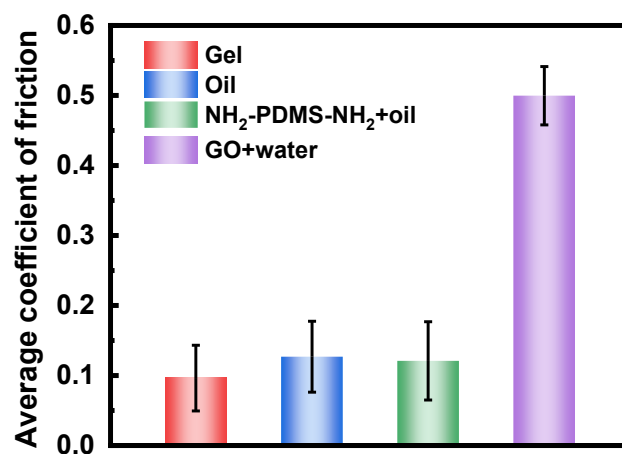

205

206 **Fig. S14** Average CoF of the Pickering emulsion gel and its different compositions calculated

207 from multiple ( $n \geq 3$ ) reproducible measurements at 30 N and 80 mm s<sup>-1</sup>. T = 25 °C.

208

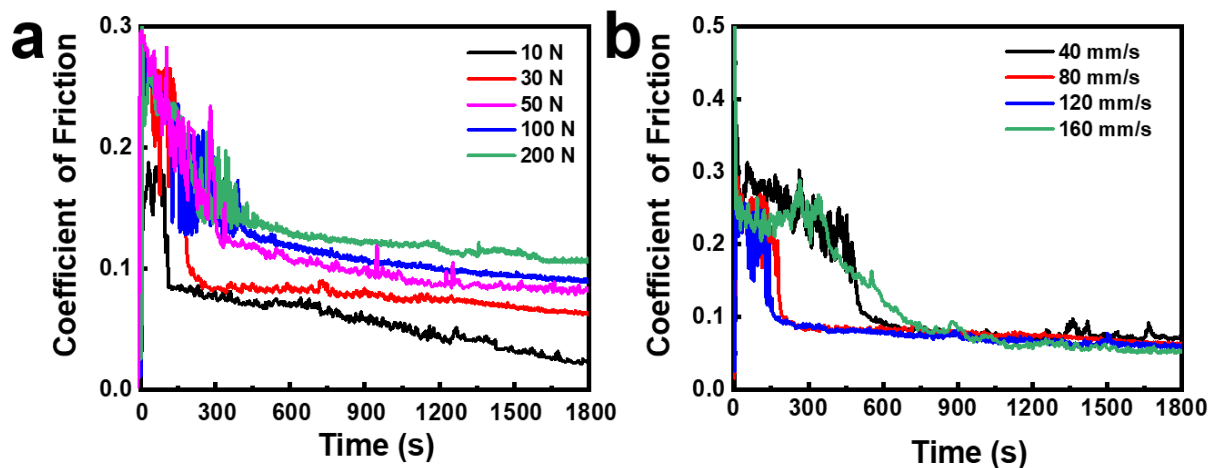

209

210 **Fig. S15** CoF of the Pickering emulsion gel lubricant at (a) a constant sliding velocity of 80  
 211  $\text{mm s}^{-1}$  and different applied normal loads and (b) a fixed normal load of 30 N and different  
 212 sliding velocities at room temperature.  $c_{\text{GO}} = 0.3 \text{ mg mL}^{-1}$ .  $c_{\text{NH}_2\text{-PDMS-NH}_2} = 10 \text{ mg mL}^{-1}$ .  $V_{\text{W}}\%$   
 213  $= 50\%$ .  $\text{pH} = 7$ .

214

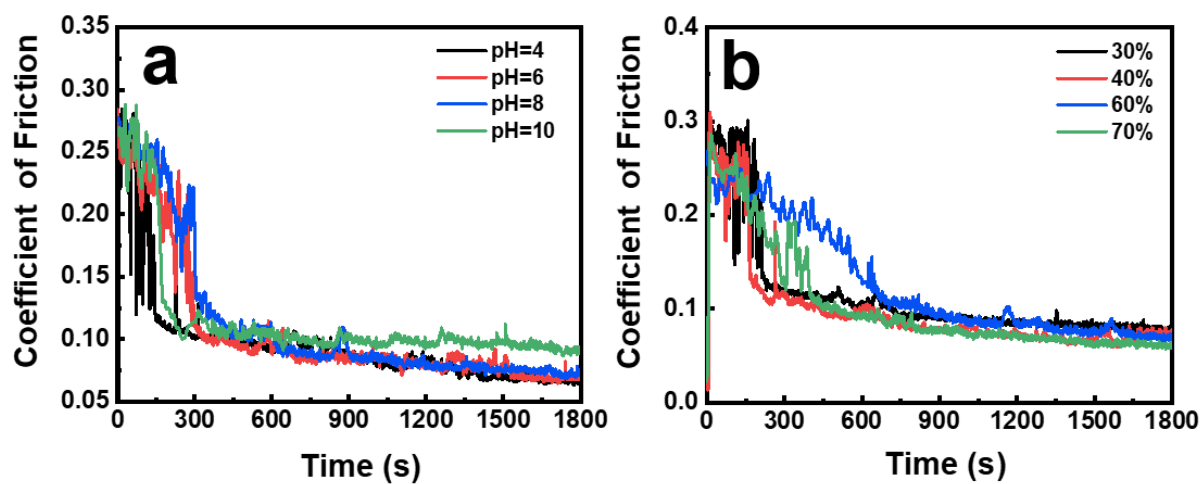

215

216 **Fig. S16** Effect of the (a) pH value and (b) water volume fraction on the CoF of a Pickering

217 emulsion gel.  $c_{GO} = 0.3 \text{ mg mL}^{-1}$ .  $c_{NH_2-PDMS-NH_2} = 10 \text{ mg mL}^{-1}$ .  $T = 25 \text{ }^\circ\text{C}$ .

218

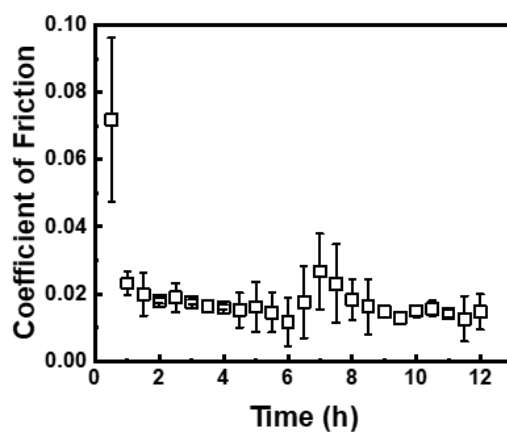

219

220 **Fig. S17** Variations in the CoF of the Pickering emulsion gel lubricant over time at ambient

221 temperature.  $c_{GO} = 0.3 \text{ mg mL}^{-1}$ .  $c_{NH_2-PDMS-NH_2} = 10 \text{ mg mL}^{-1}$ .  $V_W\% = 50\%$ .  $pH = 7$ .

222

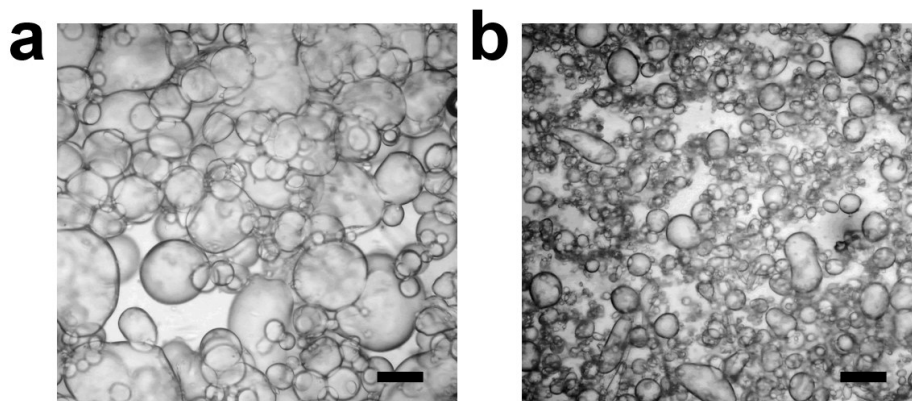

223

224 **Fig. S18** OM observations on the Pickering emulsion gels (a) before and (b) after the friction

225 tests. Scale bar = 100  $\mu\text{m}$ . T = 25  $^{\circ}\text{C}$ .

226



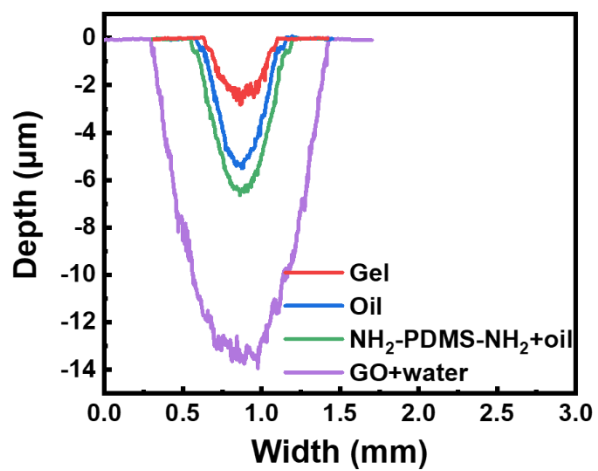

227

228 **Fig. S19** Width and depth of the wear scar on a steel substrate lubricated with the Pickering

229 emulsion gel and its different compositions. T = 25 °C.

230

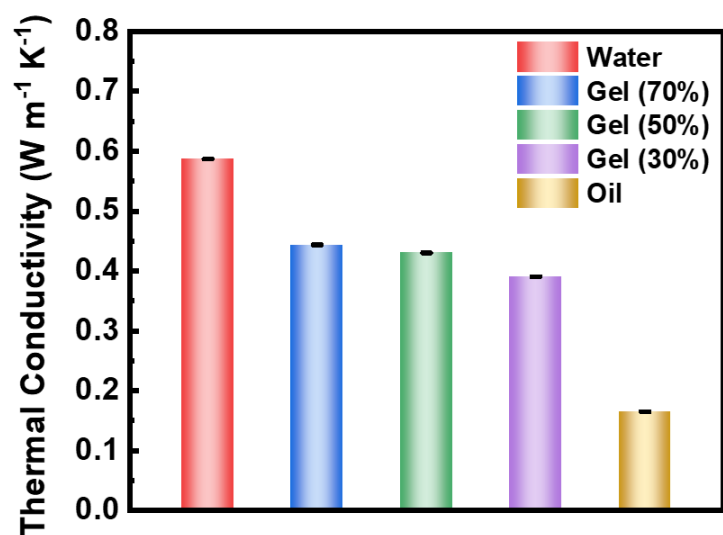

231

232 **Fig. S20** Thermal conductivity of the deionized water, DSO and Pickering emulsion gels with  
233 different water volume fractions at 25 °C.  $c_{GO} = 0.3 \text{ mg mL}^{-1}$ .  $c_{NH_2-PDMS-NH_2} = 10 \text{ mg mL}^{-1}$ . pH  
234 = 7.

235

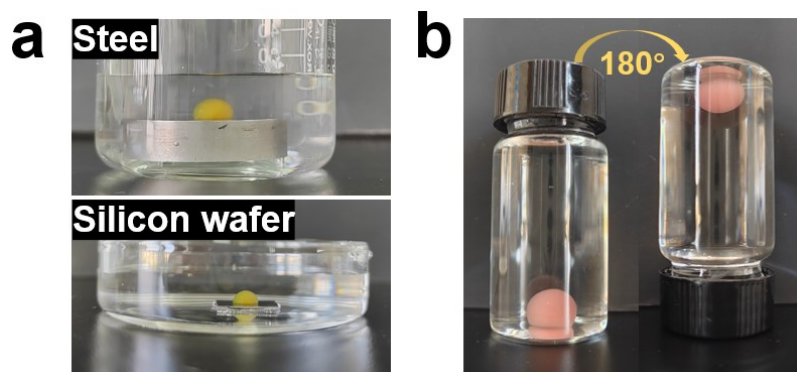

236

237 **Fig. S21** Photographs of the Pickering emulsion gel lubricants adhering on different substrates.

238 Dyes including sodium fluorescein and methyl red were used to stain the gels for better

239 visualization.  $c_{GO} = 0.3 \text{ mg mL}^{-1}$ .  $c_{NH_2-PDMS-NH_2} = 10 \text{ mg mL}^{-1}$ .  $V_W\% = 50\%$ .  $pH = 7$ .  $T = 25 \text{ }^\circ\text{C}$ .

240

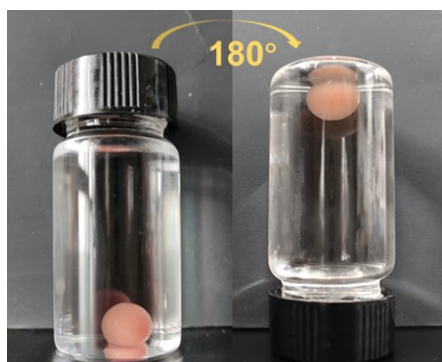

241

242 **Fig. S22** Photographs of a Pickering emulsion gel after adhering on a glass bottle bottom for

243 90 days.  $c_{GO} = 0.3 \text{ mg mL}^{-1}$ .  $c_{NH_2-PDMS-NH_2} = 10 \text{ mg mL}^{-1}$ .  $V_W\% = 50\%$ .  $pH = 7$ .  $T = 25 \text{ }^\circ\text{C}$ .

244

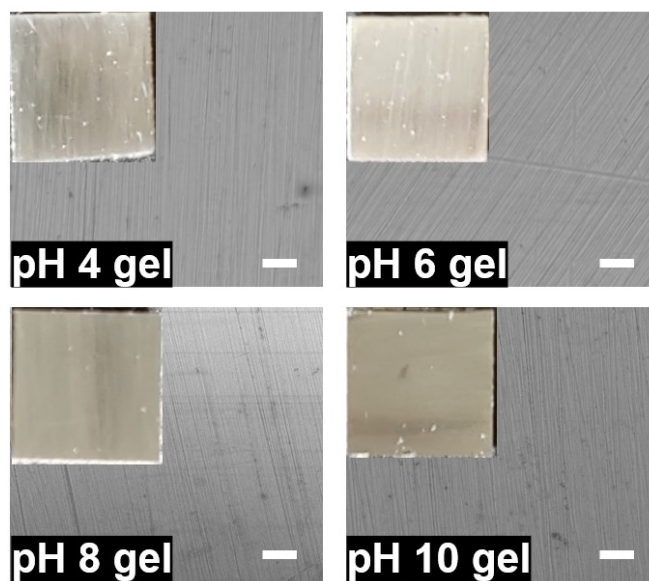

245

246 **Fig. S23** Photographs and SEM images of the steel blocks pre-coated with a small amount of

247 Pickering emulsion gels after placed in deionized water for 72 h at 50 °C. Scale bars = 10  $\mu\text{m}$ .

248  $c_{\text{GO}} = 0.3 \text{ mg mL}^{-1}$ .  $c_{\text{NH}_2\text{-PDMS-NH}_2} = 10 \text{ mg mL}^{-1}$ .  $V_{\text{W}}\% = 50\%$ .

249

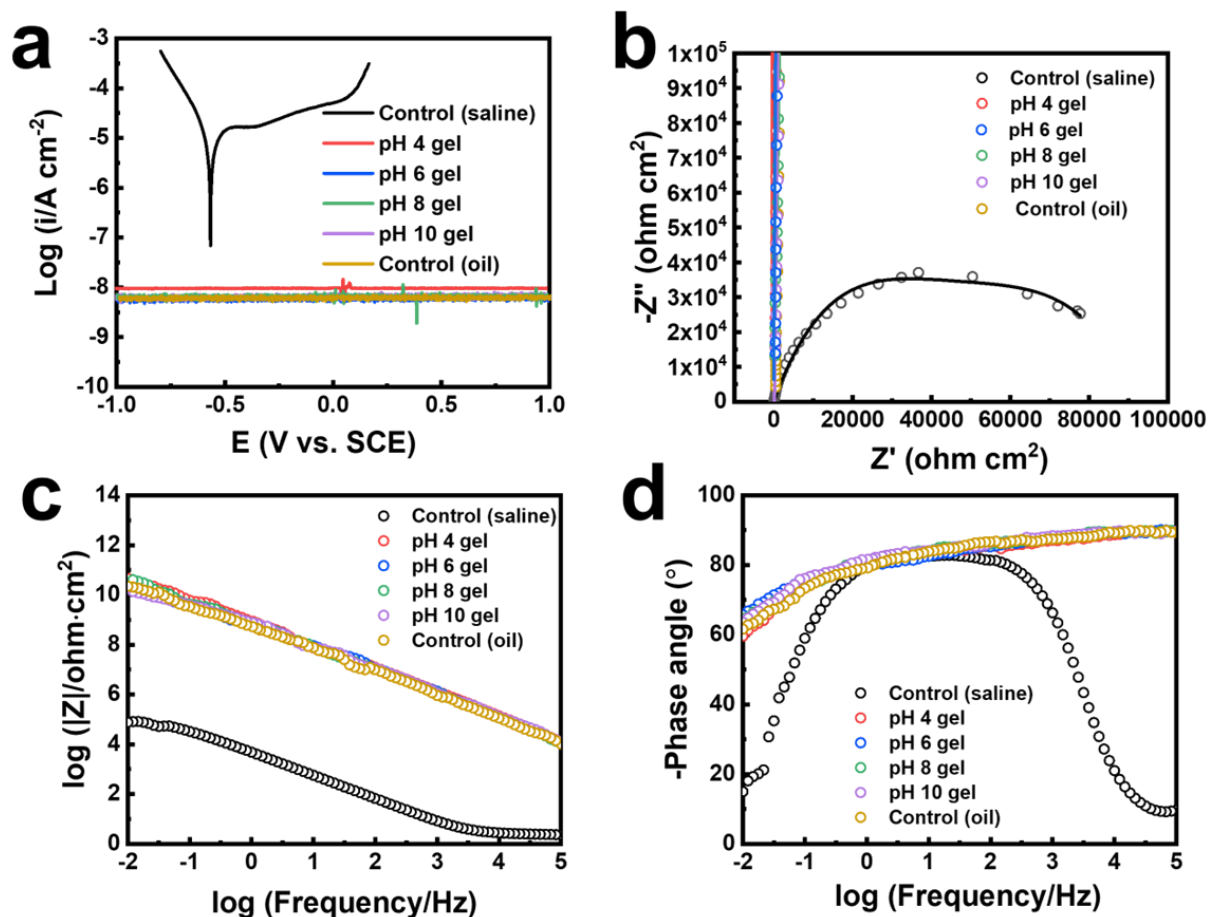

250  
 251 **Fig. S24** (a) Polarization curves, (b) Nyquist plots, (c) impedance curves, and (d) the body  
 252 phase angles of the steel working electrodes upon either directly submerged in 3.5 wt% NaCl  
 253 solutions and oil or pre-covered with a small amount of the Pickering emulsion gels and then  
 254 placed in the saline.  $c_{\text{GO}} = 0.3 \text{ mg mL}^{-1}$ .  $c_{\text{NH}_2\text{-PDMS-NH}_2} = 10 \text{ mg mL}^{-1}$ .  $V_{\text{W}}\% = 50\%$ .  $T = 25 \text{ }^\circ\text{C}$ .  
 255

256

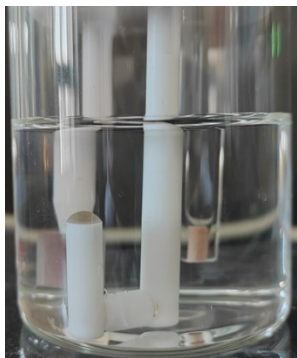

257 **Fig. S25** Photograph of a gel-covered steel working electrode submerged in saline at 25 °C.

258

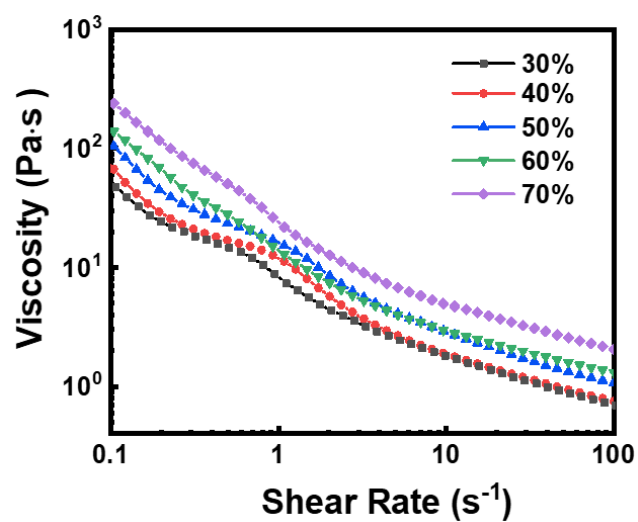

259

260 **Fig. S26** Variations in the shear viscosity of the Pickering emulsion gels with different water

261 volume fractions as a function of external shear rate.  $c_{GO} = 0.3 \text{ mg mL}^{-1}$ .  $c_{NH_2-PDMS-NH_2} = 10 \text{ mg}$

262  $\text{mL}^{-1}$ .  $\text{pH} = 7$ .  $T = 25 \text{ }^\circ\text{C}$ .

263



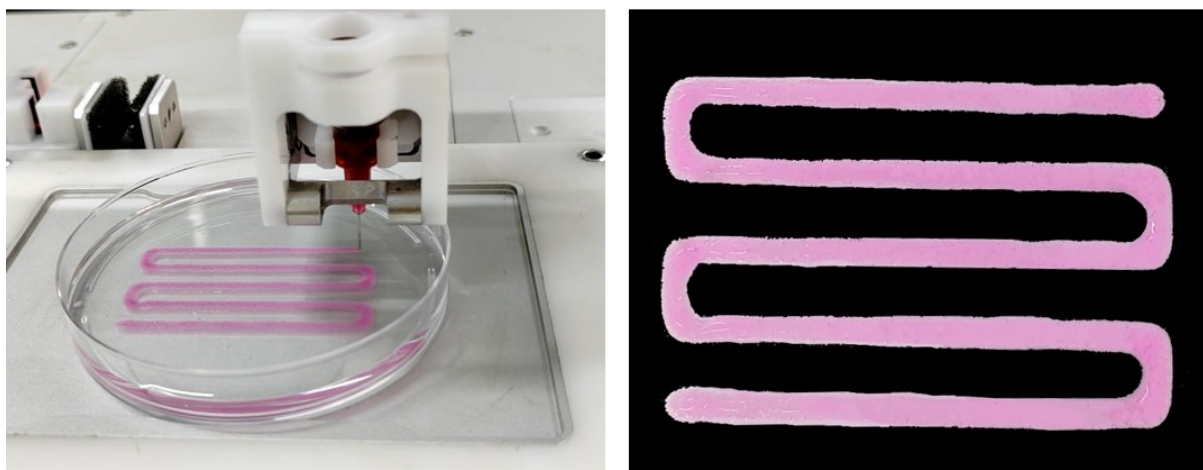

264

265 **Fig. S27** Photographs of under-water 3D printing of the Pickering emulsion gels and the

266 resultant snake-shaped pattern.  $c_{GO} = 0.3 \text{ mg mL}^{-1}$ .  $c_{NH_2\text{-PDMS-NH}_2} = 10 \text{ mg mL}^{-1}$ .  $V_W\% = 50\%$ .

267  $\text{pH} = 7$ .  $T = 25 \text{ }^\circ\text{C}$ .

268

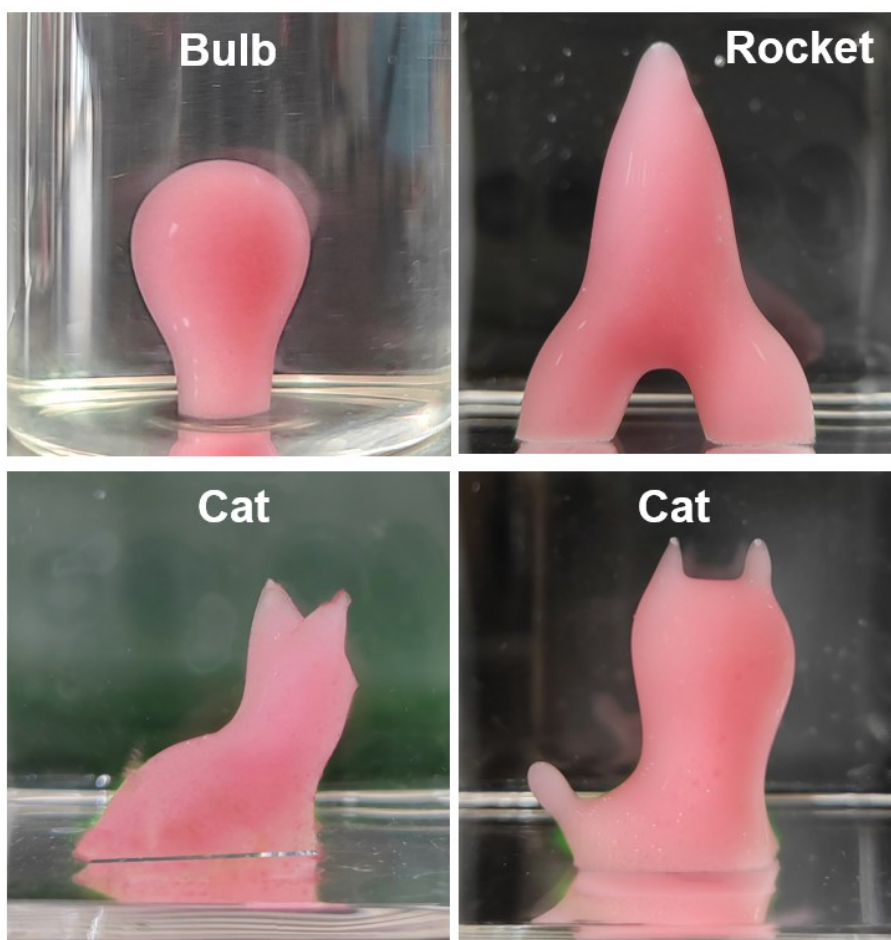

269

270 **Fig. S28** Printed different 3D structures from direct extrusion of the Pickering emulsion gels

271 into water.  $c_{GO} = 0.3 \text{ mg mL}^{-1}$ .  $c_{NH_2-PDMS-NH_2} = 10 \text{ mg mL}^{-1}$ .  $V_W\% = 50\%$ .  $pH = 7$ .  $T = 25 \text{ }^\circ\text{C}$ .

272

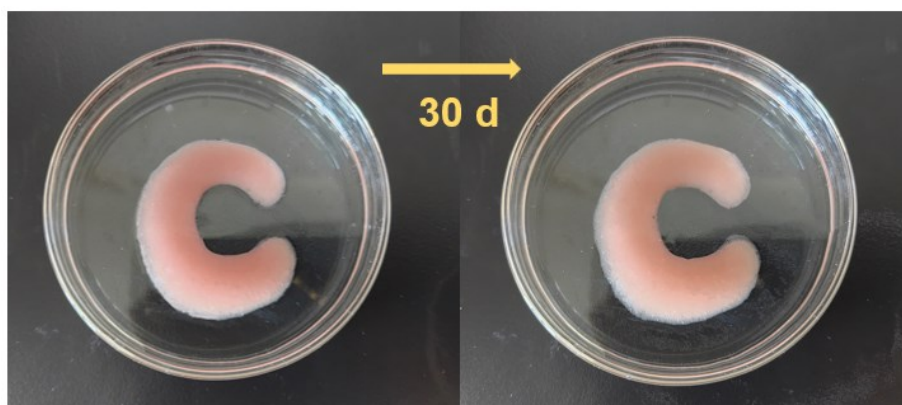

273

274 **Fig. S29** Printed letter “C” after submerged in water for continuous 30 days at 25 °C.

275

- 276 **Movie S1.** Squeezing and detaching process of two aqueous GO droplets enclosed in an NH<sub>2</sub>-  
277 PDMS-NH<sub>2</sub> oil solution.
- 278 **Movie S2.** Under-water printing of the Pickering emulsion gel inks into a 2D spiral pattern.
- 279 **Movie S3.** Under-water printing of the Pickering emulsion gels into a 3D configuration.  
280

281 **References**

- 282 S1. R. P. Valle, T. Wu and Y. Y. Zuo, *ACS Nano*, 2015, **9**, 5413-5421.  
283 S2. G. Li, X. Xu and Y. Y. Zuo, *J. Colloid Interface Sci.*, 2023, **630**, 21-27.  
284 S3. J. Yang, K. Yu and Y. Y. Zuo, *Langmuir*, 2017, **33**, 8914-8923.  
285 S4. K. Yu, J. Yang and Y. Y. Zuo, *Langmuir*, 2016, **32**, 4820-4826.  
286
